# Supplementary material
Source: PubMed Central journal article supplement (PMC5817891)
Supplement: NIHMS940918-supplement-Supple.pdf [file NIHMS940918-supplement-Supple.pdf]

**A**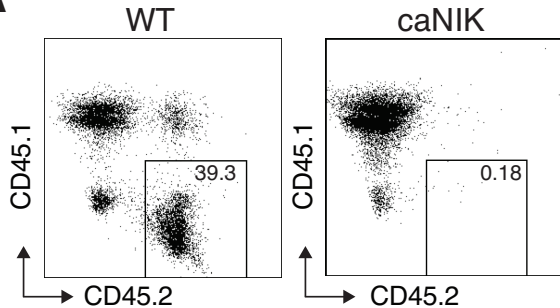**B**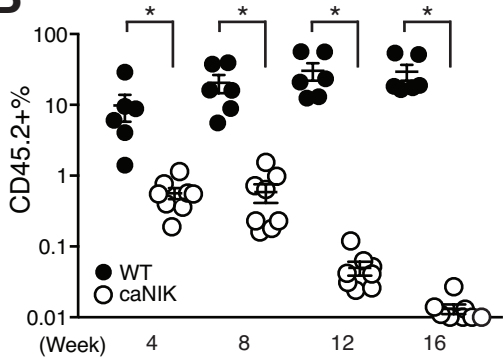

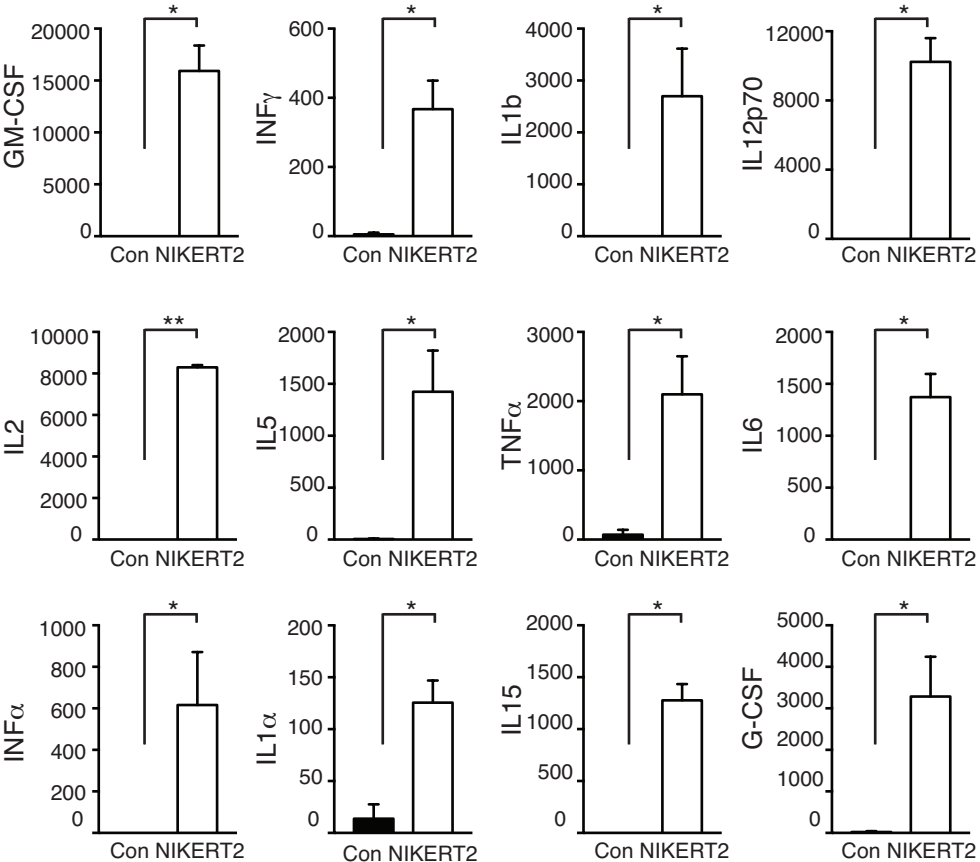

Supplemental Fig. 2 Zhao et al.

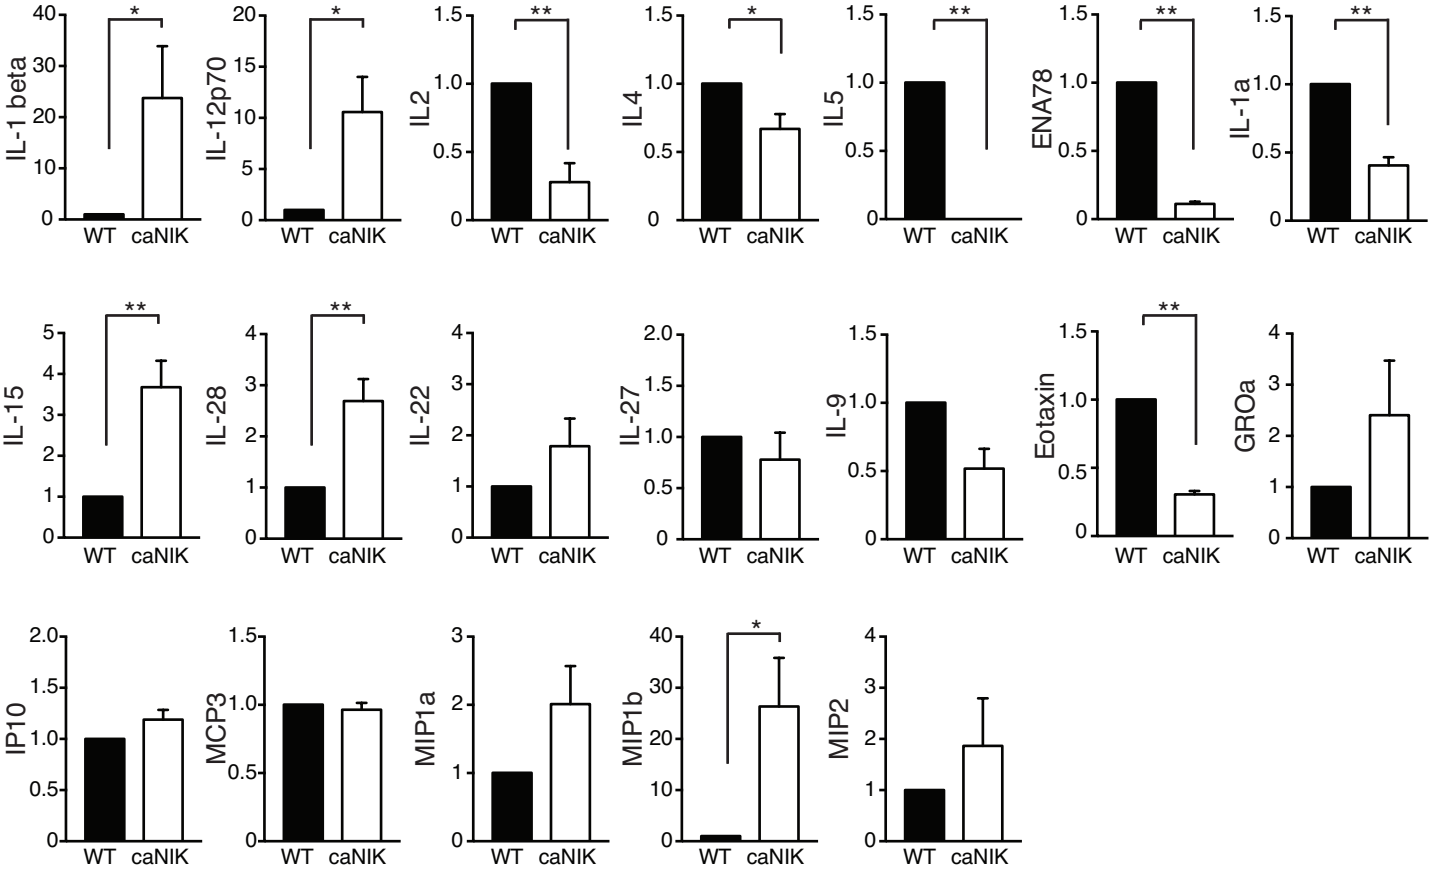

**A**

Control

NIKERT2

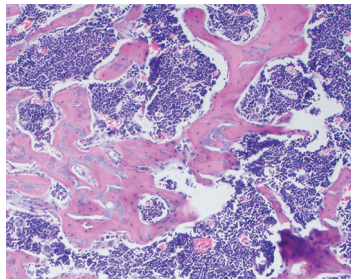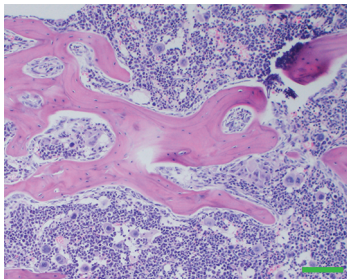

Femur

**B**

Control

NIKERT2

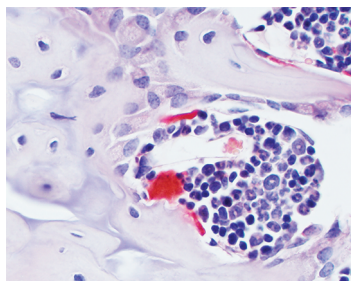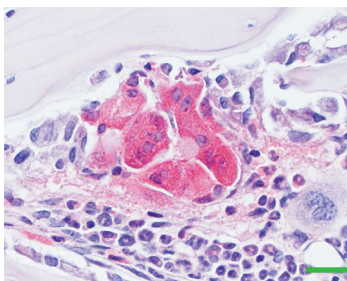

TRAP

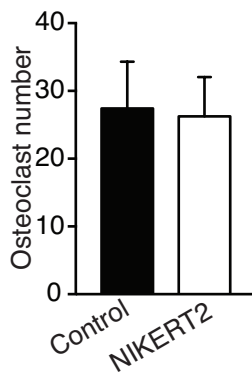**C**

Control

NIKERT2

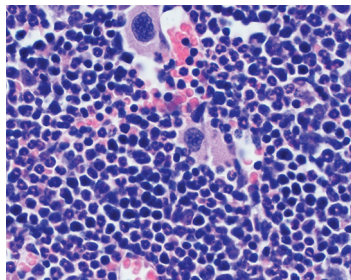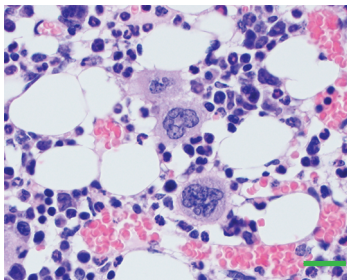

Bone marrow

**A**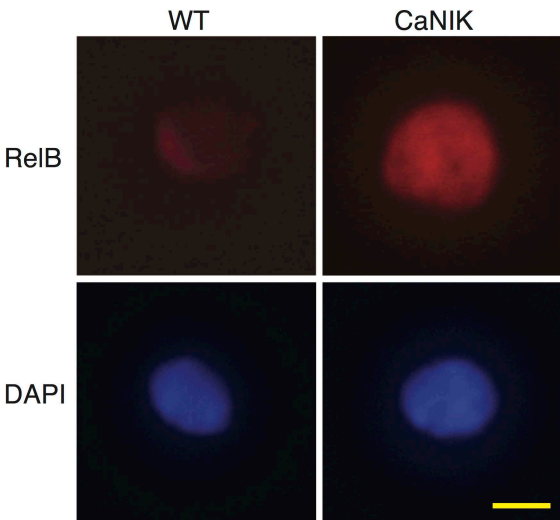**B**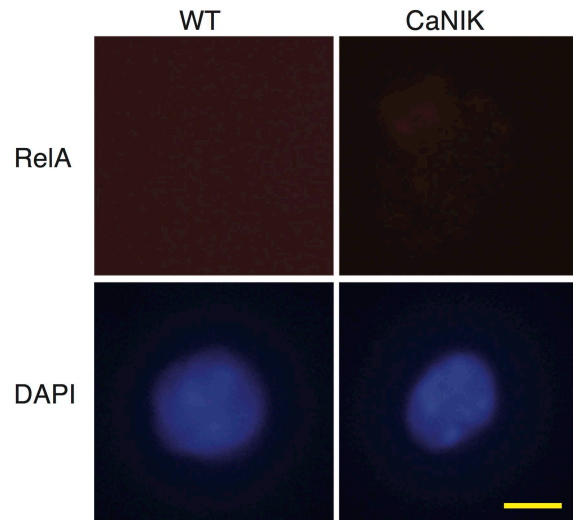**C**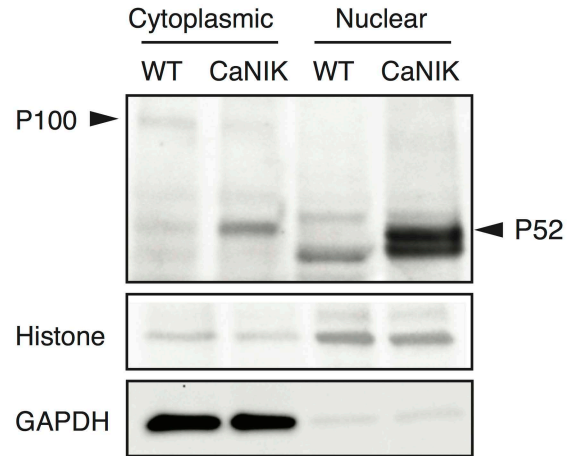

Supplemental Fig. 4 Zhao et al.

**A**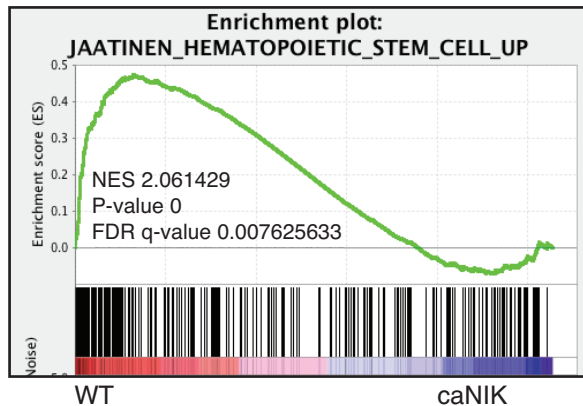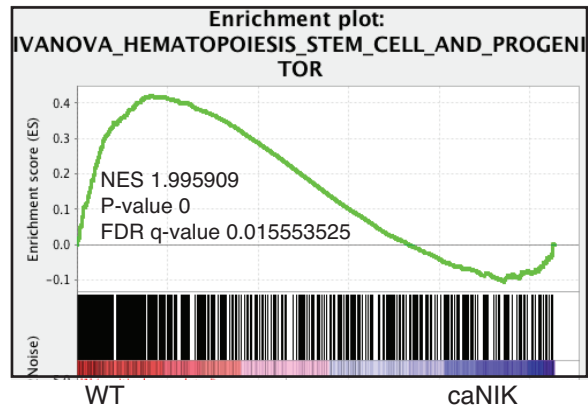**B**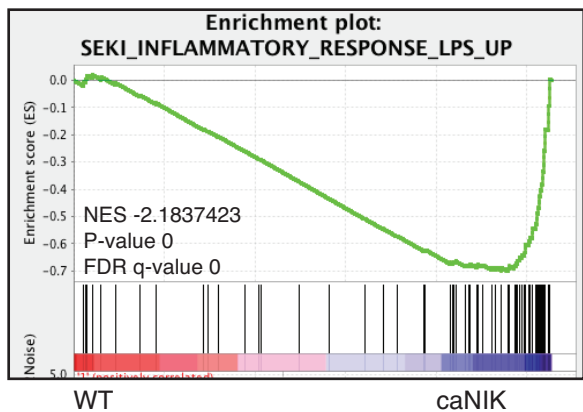**C**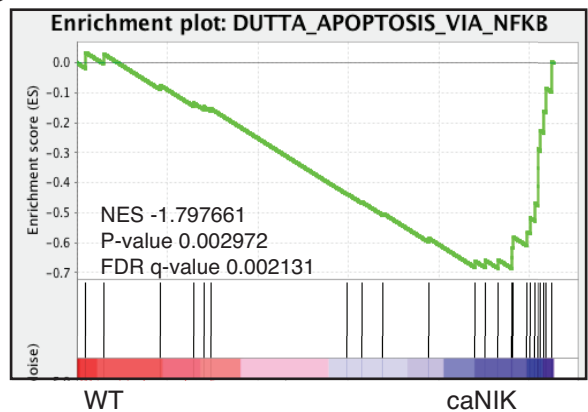

## Supplemental Figure Legends

**Supplemental Figure 1. NIK-activated HSPCs are functionally impaired.** Sorted Lin<sup>-</sup>cKit<sup>+</sup>Sca1<sup>+</sup> HSPCs (CD45.2<sup>+</sup>, 2500/recipient) from WT or caNIK mice were transplanted together with radioprotective cells (45.1<sup>+</sup>, 2×10<sup>5</sup>/recipient) into lethally irradiated congenic recipients (CD45.1<sup>+</sup>). **(A)** FACS plots show representative donor-derived chimerism from recipients receiving WT or caNIK KLS cells 16 weeks post-BMT. **(B)** Donor-derived chimerisms at 16 weeks post-BMT (six recipients receiving WT KLS cells and eight receiving caNIK KLS cells, \*p<0.05). Each dot represents one individual recipient.

**Supplemental Figure 2. Systemic NIK activation induces inflammatory cytokine “storm”.** Mouse serum was prepared by centrifugation of clotted mouse peripheral blood from control or tamoxifen-treated NIKERT2 (n=4) mice and the cytokines were measured using ProcartaPlex Mouse Cytokine & Chemokine Panel 1A (36 plex) (\*p<0.05, \*\*p<0.01). The expression of IL13, IL4, ENA78, IL28, IL31, LIF, M-CSF, IL10, IL17a, IL22, IL27, IL9, Eotaxin, GROa, IP10, MCP1, MCP3, MIP1a, MIP1b, MIP2 and RANTES was also elevated (data not shown).

**Supplemental Figure 3. NIK activation up-regulates inflammatory cytokines.** Mouse serum was prepared by centrifugation of clotted mouse peripheral blood from WT (n=4) or caNIK (n=7) mice and the cytokines were measured using ProcartaPlex Mouse Cytokine & Chemokine Panel 1A (36 plex) (\*p<0.05, \*\*p<0.01). The expression of GM-

CSF, IL10, IL13, IL17a, IL31, INFa, LIF, MCP1, M-CSF and RANTES was undetectable.

**Supplemental Figure 4. Systemic activation of NIK alters BM microenvironment.**

(A) H&E stains of femurs from control or NIKERT2 mice three days after the last tamoxifen treatment (n=5). Note the decreased trabecular bone volume and osteoclast clusters in NIKERT2 femurs. Scale bar 100  $\mu$ m. (B) Left, TRAP stains of femurs from control or NIKERT2 mice three days after the last tamoxifen treatment. Scale bar 20 $\mu$ m; Right, average number of osteoclasts (mean  $\pm$  sem.) with two or more nuclei per cross-section (n=5). (C) Increased adipose tissue in tamoxifen-treated NIKERT2 bone marrow. Scale bar 20 $\mu$ m.

**Supplemental Figure 5. Increased nuclear localization of RelB and p52 in NIK**

**activated bone marrow cells.** Immunofluorescence staining of RelB (Santa Cruz, sc-226) (A) or RelA (Cell signaling Technology #8242) (B) using sorted KLS cells from WT and caNIK mice. Nuclei were counterstained with DAPI. Scale bar 5  $\mu$ m. (C)

Accelerated p100 processing and nuclear translocation by NIK activation. 50 $\mu$ g of denatured cytoplasmic or nuclear proteins extracted from control or NIK lineage<sup>-</sup> BM cells using (NEPER Nuclear and Cytoplasmic extraction reagent, ThermoScientific #78833) were run on 4-15% gel and immunoblotted with p100 antibody (Cell Signaling #4882) first, then re-probed with anti-histone H3 (Cell Signaling #4499) and anti-GAPDH (Santa Cruz sc-32233) for nuclear and cytoplasmic loading controls, respectively.



**Supplemental Figure 6. NIK activation induces increased inflammatory response signature, decreased HSPC signatures and increased apoptotic signatures.**

Gene set enrichment analysis (GSEA) of statistically significant gene sets enriched in the KLS cells of caNIK mice (up in caNIK) or WT mice (down in caNIK).
